# Supplementary material for: High-Performance Liquid Chromatography–Fluorescence Detection Method for Ochratoxin A Quantification in Small Mice Sample Volumes: Versatile Application across Diverse Matrices Relevant for Neurodegeneration Research
Source: MDPI journal article supplement (doi:10.3390/toxins16050213), 2024-05-03
Supplement: s1 [file s1]

# Supplementary Materials: High-Performance Liquid Chromatography–Fluorescence Detection Method for Ochratoxin A Quantification in Small Mice Sample Volumes: Versatile Application across Diverse Matrices Relevant for Neurodegeneration Research

Elba Beraza, Maria Serrano-Civantos, Maria Izco, Lydia Alvarez-Erviti, Elena Gonzalez-Peñas and Ariane Vettorazzi

**Table S1.** Raw data of the linearity study of column A in the following ranges: 2.35 – 22.83 ng/mL and 22.83 – 228.33 ng/mL.

|                                         | Day 1                | Day 2                | Day 3                |
|-----------------------------------------|----------------------|----------------------|----------------------|
| <b>Range 2.35 – 22.83 ng/mL</b>         |                      |                      |                      |
| Curve equation <sup>a</sup>             | $y = 9.488x - 0.826$ | $y = 9.256x - 0.995$ | $y = 8.853x + 4.989$ |
| r <sup>2</sup>                          | 0.995                | 0.994                | 0.993                |
| Slope limits (p=95%)                    | 8.652; 10.32         | 8.131; 10.382        | 7.944; 9.762         |
| Intercept limits (p=95%)                | -10.63; 8.976        | -9.77; 7.78          | -5.66; 15.65         |
| CV <sup>c</sup> of response factors (%) | 4.88                 | 3.24                 | 4.55                 |
| Back-calculated RE <sup>b</sup> (%)     | < 7.5                | < 4.2                | < 7.4                |
| <b>Range 22.83 – 228.33 ng/mL</b>       |                      |                      |                      |
| Curve equation <sup>a</sup>             | $y = 8.639x + 1.714$ | $y = 8.585x - 5.356$ | $y = 8.988x + 5.589$ |
| r <sup>2</sup>                          | 0.999                | 0.998                | 0.998                |
| Slope limits (p=95%)                    | 8.264; 9.015         | 7.976; 9.195         | 8.482; 9.493         |
| Intercept limits (p=95%)                | -41.84; 45.27        | -82.59; 71.87        | -53.10; 64.28        |
| CV <sup>c</sup> of response factors (%) | 4.03                 | 4.14                 | 4.39                 |
| Back-calculated RE <sup>b</sup> (%)     | < 7.3                | < 7.4                | < 7.2                |

<sup>a</sup> y: peak area, x: concentration of OTA (ng/mL for plasma or ng/g for tissues).

<sup>b</sup> Relative error.

<sup>c</sup> Coefficient of variation.

**Table S2.** Raw data from the precision and accuracy study. The precision within-day was studied by analyzing some calibrators (2.35, 22.83, 228.33 ng/mL) in triplicate each day. The precision between-day was assured analyzing calibrators of these levels in three different days.

| C <sub>nominal</sub><br>(ng/mL)                  | Day 1                            |                 |                    | Day 2                            |                 |                    | Day 3                            |                 |                    |
|--------------------------------------------------|----------------------------------|-----------------|--------------------|----------------------------------|-----------------|--------------------|----------------------------------|-----------------|--------------------|
|                                                  | C <sub>measured</sub><br>(ng/mL) | CV <sup>a</sup> | A <sup>b</sup> (%) | C <sub>measured</sub><br>(ng/mL) | CV <sup>a</sup> | A <sup>b</sup> (%) | C <sub>measured</sub><br>(ng/mL) | CV <sup>a</sup> | A <sup>b</sup> (%) |
| <b>Range 2.35 – 22.83 ng/mL</b> <sup>c,d</sup>   |                                  |                 |                    |                                  |                 |                    |                                  |                 |                    |
| 2.35                                             | 2.18                             | 4.91            | 7.4                | 2.28                             | 3.48            | 2.8                | 2.21                             |                 | 5.8                |
|                                                  | 2.40                             |                 | 2.1                | 2.35                             |                 | 0.1                | 2.29                             | 4.08            | 2.7                |
|                                                  | 2.30                             |                 | 2.0                | 2.19                             |                 | 6.6                | 2.40                             |                 | 2.2                |
| 22.83                                            | 23.15                            | 2.17            | 1.4                | 20.62                            | 10.7            | 9.7                | 22.00                            |                 | 3.6                |
|                                                  | 22.83                            |                 | 0.0                | 20.44                            |                 | 10.5               | 22.06                            | 2.09            | 3.4                |
|                                                  | 22.19                            |                 | 2.8                | 20.13                            |                 | 11.8               | 21.25                            |                 | 6.9                |
| <b>Range 22.83 – 228.33 ng/mL</b> <sup>e,f</sup> |                                  |                 |                    |                                  |                 |                    |                                  |                 |                    |
| 22.83                                            | 23.88                            | 2.22            | 4.6                | 21.22                            | 1.25            | 7.1                | 22.67                            | 2.13            | 0.7                |
|                                                  | 23.54                            |                 | 3.1                | 21.03                            |                 | 7.9                | 22.73                            |                 | 0.4                |
|                                                  | 22.86                            |                 | 0.1                | 20.70                            |                 | 9.3                | 21.87                            |                 | 4.2                |
| 228.33                                           | 211.50                           | 1.83            | 7.4                | 224.42                           | 2.40            | 1.7                | 235.50                           | 0.49            | 3.1                |
|                                                  | 208.68                           |                 | 8.6                | 233.23                           |                 | 2.1                | 234.84                           |                 | 2.9                |
|                                                  | 216.34                           |                 | 5.3                | 234.65                           |                 | 2.8                | 237.11                           |                 | 3.8                |

<sup>a</sup> Coefficient of variation (%).

<sup>b</sup> Accuracy (RE%).

<sup>c</sup> Equivalent range in plasma: 2.35 – 22.83 ng/mL (no dilution factor)

<sup>d</sup> Equivalent range in kidney, liver, brain and intestine tissue: 9.4 – 91.32 ng/g (dilution factor: 4).

<sup>e</sup> Equivalent range in plasma: 342.45 – 3424.95 ng/mL (dilution factor: 15)

<sup>f</sup> Equivalent range in kidney, liver, brain and intestine tissue: 91.32 – 913.32 ng/g (dilution factor: 4).

**Table S3.** Raw data from the recovery study. The repeatability of the process was studied by carrying out the complete recovery experiment for each matrix on 1 day (within-day) and on 3 different days (between-day).

| <b>C<sub>nominal</sub> (ng/mL)</b> |                                                       | <b>2.35</b> |       |       | <b>22.83</b> |       |       | <b>228.33</b> |        |       |
|------------------------------------|-------------------------------------------------------|-------------|-------|-------|--------------|-------|-------|---------------|--------|-------|
|                                    |                                                       | Day 1       | Day 2 | Day 3 | Day 1        | Day 2 | Day 3 | Day 1         | Day 2  | Day 3 |
| Brain                              | Measure 1                                             | 68.05       | 65.98 | 57.79 | 73.60        | 90.35 | 75.40 | 87.50         | 94.40  | 81.92 |
|                                    | Measure 2                                             | 68.01       | 70.26 | 55.81 | 83.41        | 85.04 | 87.00 | 79.47         | 100.82 | 86.83 |
|                                    | Measure 3                                             | 61.98       | 71.60 | 69.16 | 81.68        | 93.72 | 77.34 | 88.85         | 107.49 | 88.55 |
|                                    | <b>Within-day recovery (n=3, first three dataset)</b> |             |       |       |              |       |       |               |        |       |
|                                    | Mean                                                  | 66.01       |       |       | 79.56        |       |       | 85.27         |        |       |
|                                    | CV <sup>a</sup> (%)                                   | 5.3         |       |       | 6.6          |       |       | 5.9           |        |       |
|                                    | <b>Between-day recovery (n=9)</b>                     |             |       |       |              |       |       |               |        |       |
|                                    | Mean                                                  | 65.40       |       |       | 83.06        |       |       | 90.65         |        |       |
|                                    | CV <sup>a</sup> (%)                                   | 8.6         |       |       | 8.2          |       |       | 9.8           |        |       |
| Liver                              | Measure 1                                             | 77.76       | 79.65 | 61.10 | 83.68        | 89.95 | 71.04 | 74.31         | 71.82  | 71.04 |
|                                    | Measure 2                                             | 71.96       | 63.27 | 72.33 | 84.00        | 83.56 | 70.83 | 81.14         | 75.87  | 81.53 |
|                                    | Measure 3                                             | 73.76       | 74.91 | 68.33 | 81.97        | 83.14 | 74.19 | 81.06         | 80.75  | 74.96 |
|                                    | <b>Within-day recovery (n=3, first three dataset)</b> |             |       |       |              |       |       |               |        |       |
|                                    | Mean                                                  | 74.49       |       |       | 83.22        |       |       | 78.84         |        |       |
|                                    | CV <sup>a</sup> (%)                                   | 4.0         |       |       | 1.3          |       |       | 5.0           |        |       |
|                                    | <b>Between-day recovery (n=9)</b>                     |             |       |       |              |       |       |               |        |       |
|                                    | Mean                                                  | 71.45       |       |       | 80.26        |       |       | 76.94         |        |       |
|                                    | CV <sup>a</sup> (%)                                   | 8.7         |       |       | 8.3          |       |       | 5.5           |        |       |
| Kidney                             | Measure 1                                             | 91.47       | 87.65 | 85.63 | 88.82        | 94.58 | 97.04 | 77.20         | 82.05  | 81.99 |
|                                    | Measure 2                                             | 86.37       | 91.66 | 69.85 | 92.41        | 93.46 | 88.66 | 90.21         | 87.67  | 84.31 |
|                                    | Measure 3                                             | 91.15       | 76.93 | 91.24 | 91.39        | 86.99 | 95.88 | 90.21         | 87.27  | 82.42 |
|                                    | <b>Within-day recovery (n=3, first three dataset)</b> |             |       |       |              |       |       |               |        |       |
|                                    | Mean                                                  | 89.66       |       |       | 90.87        |       |       | 85.87         |        |       |
|                                    | CV <sup>a</sup> (%)                                   | 3.2         |       |       | 2.0          |       |       | 8.7           |        |       |
|                                    | <b>Between-day recovery (n=9)</b>                     |             |       |       |              |       |       |               |        |       |
|                                    | Mean                                                  | 85.77       |       |       | 92.14        |       |       | 84.81         |        |       |
|                                    | CV <sup>a</sup> (%)                                   | 8.9         |       |       | 3.8          |       |       | 5.1           |        |       |
| Intestine                          | Measure 1                                             | 75.05       | 61.84 | 73.80 | 81.33        | 77.07 | 71.09 | 93.43         | 85.87  | 97.99 |
|                                    | Measure 2                                             | 71.00       | 70.90 | 73.76 | 84.28        | 85.63 | 77.61 | 78.90         | 95.31  | 84.51 |
|                                    | Measure 3                                             | 65.89       | 77.76 | 68.65 | 77.01        | 86.54 | 78.77 | 96.60         | 77.82  | 96.47 |
|                                    | <b>Within-day recovery (n=3, first three dataset)</b> |             |       |       |              |       |       |               |        |       |
|                                    | Mean                                                  | 70.64       |       |       | 80.87        |       |       | 89.64         |        |       |
|                                    | CV <sup>a</sup> (%)                                   | 6.50        |       |       | 4.52         |       |       | 10.53         |        |       |
|                                    | <b>Between-day recovery (n=9)</b>                     |             |       |       |              |       |       |               |        |       |
|                                    | Mean                                                  | 70.96       |       |       | 79.93        |       |       | 89.66         |        |       |
|                                    | CV <sup>a</sup> (%)                                   | 6.9         |       |       | 6.2          |       |       | 8.9           |        |       |
| Plasma                             | Measure 1                                             | 72.42       | 58.34 | 74.40 | 79.22        | 78.80 | 80.80 | 74.38         | 75.46  | 74.16 |
|                                    | Measure 2                                             | 73.02       | 64.88 | 72.98 | 80.41        | 80.39 | 79.76 | 72.38         | 74.56  | 74.78 |
|                                    | Measure 3                                             | 67.91       | 68.28 | 72.98 | 83.22        | 79.95 | 83.14 | 73.82         | 75.49  | 74.27 |
|                                    | <b>Within-day recovery (n=3, first three dataset)</b> |             |       |       |              |       |       |               |        |       |
|                                    | Mean                                                  | 71.12       |       |       | 80.95        |       |       | 73.53         |        |       |
|                                    | CV <sup>a</sup> (%)                                   | 3.9         |       |       | 2.5          |       |       | 1.4           |        |       |
|                                    | <b>Between-day recovery (n=9)</b>                     |             |       |       |              |       |       |               |        |       |
|                                    | Mean                                                  | 69.46       |       |       | 80.63        |       |       | 74.37         |        |       |
|                                    | CV <sup>a</sup> (%)                                   | 7.5         |       |       | 1.9          |       |       | 1.3           |        |       |

<sup>a</sup> Coefficient of variation.

**Table S4.** Results of the robustness study. Raw data of the linearity study of column B in the following ranges: 2.35 – 22.83 ng/mL and 22.83 – 228.33 ng/mL.

|                                         | Day 1                | Day 2                 | Day 3                |
|-----------------------------------------|----------------------|-----------------------|----------------------|
| <b>Range 2.35 – 22.83 ng/mL</b>         |                      |                       |                      |
| Curve equation <sup>a</sup>             | $y = 9.652x - 0.379$ | $y = 9.348x + 0.434$  | $y = 9.674x + 1.567$ |
| r <sup>2</sup>                          | 0.991                | 0.993                 | 0.997                |
| Slope limits (p=95%)                    | 8.490; 10.815        | 8.365; 10.330         | 8.963; 10.386        |
| Intercept limits (p=95%)                | -14.01; 13.25        | -11.09; 11.95         | -6.78; 9.91          |
| CV <sup>c</sup> of response factors (%) | 6.13                 | 6.55                  | 4.20                 |
| Back-calculated RE <sup>b</sup> (%)     | < 10.7               | < 11.9                | < 6.5                |
| <b>Range 22.83 – 228.33 ng/mL</b>       |                      |                       |                      |
| Curve equation <sup>a</sup>             | $y = 9.103x + 1.949$ | $y = 8.979x - 17.909$ | $y = 9.240x - 7.715$ |
| r <sup>2</sup>                          | 0.999                | 0.998                 | 0.998                |
| Slope limits (p=95%)                    | 8.264; 9.015         | 8.438; 9.520          | 8.776; 9.705         |
| Intercept limits (p=95%)                | -29.58; 33.47        | -80.68; 44.87         | -61.59; 46.16        |
| CV <sup>c</sup> of response factors (%) | 2.65                 | 4.73                  | 3.12                 |
| Back-calculated RE <sup>b</sup> (%)     | < 3.5                | < 11.3                | < 8.1                |

<sup>a</sup> y: peak area, x: concentration of OTA (ng/mL for plasma or ng/g for tissues).

<sup>b</sup> Relative error.

<sup>c</sup> Coefficient of variation.

**Table S5.** Global calibration curves of column B obtained as a result of the linearity study in the following ranges: 2.35 – 22.83 ng/mL and 22.83 – 228.33 ng/mL. Eighteen data points were used for each calibration range.

|                                         | Range 2.35 – 22.83 ng/mL | Range 22.83 – 228.33 ng/mL |
|-----------------------------------------|--------------------------|----------------------------|
| Curve equation <sup>a</sup>             | $y = 9.54x + 0.417$      | $y = 9.08x - 2.33$         |
| r <sup>2</sup>                          | 0.995                    | 0.999                      |
| Slope limits (p=95%)                    | 8.72; 10.37              | 8.72; 9.44                 |
| Intercept limits (p=95%)                | -9.22; 10.05             | -44.25; 39.59              |
| CV <sup>b</sup> of response factors (%) | 4.59                     | 4.82                       |
| Back-calculated ER (%)                  | < 7.55                   | < 5.0                      |

<sup>a</sup> y: peak area, x: concentration of OTA (ng/mL for plasma or ng/g for tissues).

<sup>b</sup> Coefficient of variation.
